# Supplementary material for: Silica nanofibrous membranes with robust flexibility and thermal stability for high-efficiency fine particulate filtration
Source: Royal Society of Chemistry journal article supplement (doi:10.1039/c2ra22086e), 2012-01-01
Supplement: c2ra22086e.pdf [file c2ra22086e.pdf]

Electrical Supplementary Information for

**Silica nanofibrous membranes with robust flexibility and thermal stability for high-efficiency fine particulate filtration**

Xue Mao,<sup>ab</sup> Yang Si,<sup>ab</sup> Yuecheng Chen,<sup>ab</sup> Liping Yang,<sup>b</sup> Fan Zhao,<sup>c</sup> Bin Ding\*<sup>abd</sup> and Jianyong Yu<sup>b</sup>

<sup>a</sup> State Key Laboratory for Modification of Chemical Fibers and Polymer Materials, College of Materials Science and Engineering, Donghua University, Shanghai 201620, China. E-mail: binding@dhu.edu.cn

<sup>b</sup> Nanomaterials Research Center, Modern Textile Institute, Donghua University, Shanghai 201620, China

<sup>c</sup> Zhaohui Filter Technology Co. Ltd., Tongxiang 314500, China

<sup>d</sup> College of Materials Science and Engineering, Wuhan Textile University, Wuhan 430073, China

**Table S1** Mechanical properties of SNF membranes fabricated from HNF2 membranes with varied calcination temperatures: 600, 800, and 1000 °C, respectively.

| Sample | Calcination temperature (°C) | Thickness of membrane (μm) | Bending rigidity (gf cm) | Tensile modulus (MPa) | Tensile strength (MPa) | Elongation at break (%) |
|--------|------------------------------|----------------------------|--------------------------|-----------------------|------------------------|-------------------------|
| 1      | 600                          | 18.2                       | 0.0015                   | 152                   | 5.4                    | 20.9                    |
| 2      | 800                          | 16.1                       | 0.0037                   | 82.7                  | 4.3                    | 11.3                    |
| 3      | 1000                         | 15.1                       | 0.0076                   | 31.8                  | 2.9                    | 4.11                    |

**Table S2** Characteristics of various precursor solutions.

| Sample | Precursor solutions |                                                                        | Viscosity (cps) | Conductivity (μS cm <sup>-1</sup> ) | Surface tension (mN m <sup>-1</sup> ) |
|--------|---------------------|------------------------------------------------------------------------|-----------------|-------------------------------------|---------------------------------------|
|        | PVA (wt %)          | TEOS : H <sub>3</sub> PO <sub>4</sub> : H <sub>2</sub> O (molar ratio) |                 |                                     |                                       |
| HNF1   | 8                   | 1 : 0.01 : 11                                                          | 60              | 853                                 | 32.4                                  |
| HNF2   | 10                  |                                                                        | 130             | 828                                 | 34.9                                  |
| HNF3   | 12                  |                                                                        | 215             | 658                                 | 32.5                                  |
| HNF4   | 14                  |                                                                        | 400             | 635                                 | 34.3                                  |

**Table S3** Mechanical properties of SNF1, SNF2, SNF3, and SNF4 membranes.

| Sample | Thickness of membrane (μm) | Bending rigidity (gf cm) | Tensile modulus (MPa) | Tensile strength (MPa) | Elongation at break (%) |
|--------|----------------------------|--------------------------|-----------------------|------------------------|-------------------------|
| SNF1   | 15.9                       | 0.0020                   | 31.8                  | 3.6                    | 8.61                    |
| SNF2   | 18.2                       | 0.0037                   | 82.7                  | 4.3                    | 11.3                    |
| SNF3   | 23.2                       | 0.0156                   | 114                   | 5.5                    | 23.5                    |
| SNF4   | 29.1                       | 0.0169                   | 146                   | 7.2                    | 24.5                    |

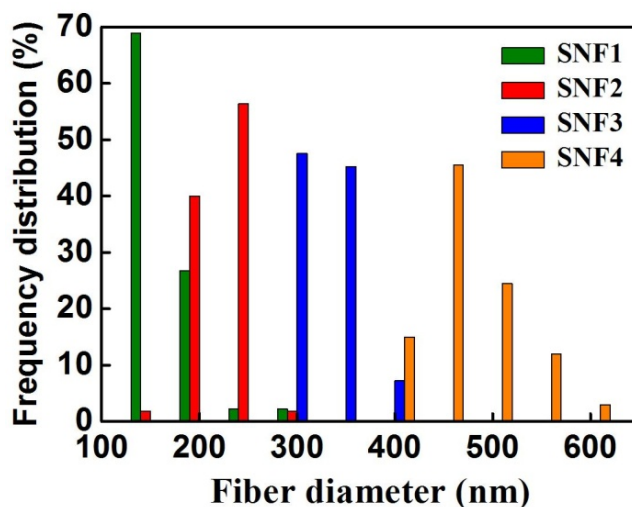

**Fig. S1** The diameter distribution of SNF1, SNF2, SNF3, and SNF4 fibers.

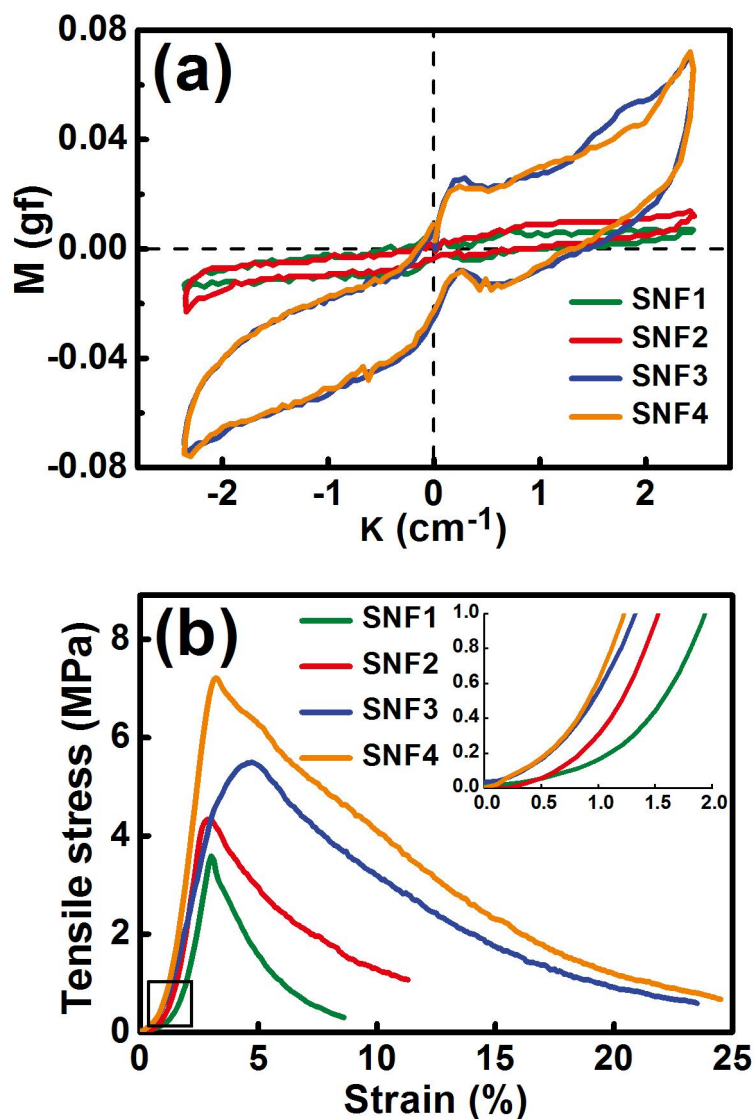

**Fig. S2** (a) The KES-FB2 tests and (b) stress-strain curves of SNF1, SNF2, SNF3, and SNF4 filtration membranes. Inset: the stress-strain curves over the low strain range (strain < 2%) of SNF membranes.
